RESEARCH ARTICLE

# Study on the Cytotoxic, Genotoxic and Clastogenic Potential of *Attalea phalerata* Mart. ex Spreng. Oil Pulp *In Vitro* and *In Vivo* Experimental Models

Fernando Freitas de Lima<sup>1\*</sup>, Sara Emilia Lima Tolouei Menegati<sup>2</sup>, Giseli Karenina Traesel<sup>1</sup>, Flávio Henrique Souza de Araújo<sup>5</sup>, Caroline Honaiser Lescano<sup>6</sup>, Sara Moraes Peixoto<sup>1</sup>, Felipe Ariel Mao Silva<sup>1</sup>, Sílvia Cristina Heredia Vieira<sup>4</sup>, Maria do Carmo Vieira<sup>3</sup>, Sílvia Aparecida Oesterreich<sup>1</sup>

**1** Faculty of Health Science, Federal University of Grande Dourados, Dourados, Brazil, **2** Faculty of Biological and Environmental Sciences, Federal University of Grande Dourados, Dourados, Brazil, **3** Faculty of Agricultural Sciences, Federal University of Grande Dourados, Dourados, Brazil, **4** Biodiversity Center, State University of Mato Grosso do Sul, Dourados, Brazil, **5** Center of Biological and Health Sciences, Federal University of Mato Grosso do Sul, Campo Grande, Brazil, **6** Faculty of Medicinal Sciences, State University of Campinas, Campinas, Brazil

\* [fifernando@hotmail.com](mailto:fifernando@hotmail.com)

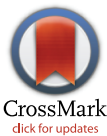

OPEN ACCESS

**Citation:** Freitas de Lima F, Lima Tolouei Menegati SE, Karenina Traesel G, Souza de Araújo FH, Honaiser Lescano C, Moraes Peixoto S, et al. (2016) Study on the Cytotoxic, Genotoxic and Clastogenic Potential of *Attalea phalerata* Mart. ex Spreng. Oil Pulp *In Vitro* and *In Vivo* Experimental Models. PLoS ONE 11(10): e0165258. doi:10.1371/journal.pone.0165258

**Editor:** Keith R. Davis, Indiana University, UNITED STATES

**Received:** July 26, 2016

**Accepted:** October 7, 2016

**Published:** October 20, 2016

**Copyright:** © 2016 Freitas de Lima et al. This is an open access article distributed under the terms of the [Creative Commons Attribution License](https://creativecommons.org/licenses/by/4.0/), which permits unrestricted use, distribution, and reproduction in any medium, provided the original author and source are credited.

**Data Availability Statement:** All relevant data are within the paper.

**Funding:** To the Coordenação de Aperfeiçoamento de Pessoal de Nível Superior (CAPES), Fundação de Apoio ao Desenvolvimento do Ensino, Ciência e Tecnologia do Estado de Mato Grosso do Sul (FUNDECT) and Conselho Nacional de Desenvolvimento Científico e Tecnológico (CNPq) for the financial support.

## Abstract

*Attalea phalerata* Mart. ex Spreng. (*Arecaceae*), popularly known as “bacuri”, is used in Brazilian folk medicine. Its oil is used orally to relieve pulmonary congestion and joint pain. In topical applications, it is applied as an effective hair tonic and anti-dandruff. The *in natura* pulp and its nuts are used as food because of its nutritional value. Despite its use in folk medicine, there is a lack of data regarding its *in vivo/in vitro* cytotoxic/genotoxic and clastogenic effects. Therefore, in this study, we evaluated the cytotoxic, genotoxic and clastogenic effects of *Attalea phalerata* Mart. ex Spreng. oil (APMO) *in vitro* and *in vivo*. For the analysis of cytotoxic potential, the *Artemia salina* and MTT (3-(4,5-dimethylthiazol-2-yl)-2,5-diphenyltetrazolium bromide) assays were performed. Possible cytotoxic, genotoxic and clastogenic effects of APMO intake were determined by performing the comet and micronucleus assays. Male and female *Wistar* rats were orally treated with doses of 125, 250, 500 or 1000 mg.kg<sup>-1</sup> of the APMO daily for 28 consecutive days (four weeks). The results showed that the APMO did not induce cell death in the experiments of *Artemia salina* and MTT, indicating that it has no cytotoxicity. The APMO did not cause significant damage to the DNA of the rats in the four doses used when compared to the negative control group (saline + Tween<sup>®</sup> 80). The APMO did not present any significant increase in micronucleated polychromatic erythrocytes (MNPCEs) for the four tested doses. When compared to the positive control group, all groups (comet and micronucleus tests) were statistically different. These data suggest that the administration of *Attalea phalerata* Mart oil. ex Spreng does not cause cytotoxicity, genotoxicity and clastogenicity in experimental models *in vitro* and *in vivo* following oral administration in this study.

**Competing Interests:** The authors have declared that no competing interests exist.

## Introduction

The therapeutic use of natural products, including medicinal plants, has become increasingly common. Pharmacological investigations are performed to identify bioactive compounds with beneficial abilities to the human organism in order to develop new drugs with reduced side effects [1, 2]. Due to the biological activity of these compounds, the evaluation of the toxic potential is essential for the safe and effective use of medicinal plants [3, 4]. Besides that, the phytochemical study of plants and foods with medicinal properties are important in order to learn about the natural compounds and their mechanisms of action [5, 6].

*Attalea phalerata* Mart. ex Spreng. (*Arecaceae*) belongs to the genus *Attalea* Kunth and is popularly known as "bacuri" or "acuri". In folk medicine, the pulp oil is used as a hair tonic and anti-dandruff. Orally, the oil is applied to relieve pulmonary congestion, joint pain and studies indicate the anti-inflammatory properties of the pulp oil due to its chemical composition [7, 8, 9]. The almond and the fruit pulp are consumed by the local population as they present high nutritional value. Some fruits of the Cerrado have similar chemical constituents, such as carotenoids and fatty acids. These compounds are of paramount importance to the pharmaceutical industry because of its pharmacological potential. Among its activities are the maintenance of the immune system and prevention of chronic diseases [10–12]. Recently, studies with Cerrado fruits have demonstrated pharmacological activities in rats [7, 13, 14].

Early in the development of a pharmaceutical there are a number of preliminary tests that basis for validating the safety of the natural chemical compounds and potentially the development of new pharmaceutical products [15–17]. According to the literature, the *Artemia salina* test is considered one of the most useful tools for preliminary tests assessing general toxicity at low cost and shows good correlation with cytotoxic activity [18, 19]. With the MTT (3-(4,5-dimethylthiazol-2-yl)-2,5-diphenyltetrazolium bromide) assay, it is possible to assess the cytotoxicity and this test is used with great success for estimating the number of viable cells in the initial screening for new drugs [20]. Through the comet assay it is possible to evaluate the genotoxic potential of a substance and the micronucleus assay provides information on cytotoxic and clastogenic effects. The use of both tests jointly is recognized by international regulatory agencies [21, 22], since the assays are very sensitive and detect breaks in the chromosomal and chromatid levels [23]. Therefore, the present study was designed to investigate the cytotoxic, genotoxic and clastogenic potentials of the pulp oil of *Attalea phalerata* Mart. ex Spreng. in *in vitro* and *in vivo* experimental models.

## Material and Methods

### Material and sample preparation

The *Attalea phalerata* Mart. ex Spreng. fruit was collected from a public area of the municipality of Rio Brilhante—MS, 21° 55' 04.6"S and 54° 32' 06.8"W and altitude 6 m. No specific permissions were required to access the area in which the fruits were collected since it is a public area (highway). The species (*A. phalerata* Mart.) used in this study is not an endangered or protected species. The plant name is in accordance with the on-line database published by "The Plant List", accessed on May 02, 2016. A voucher specimen of the species was deposited in the UFGD DDMS Herbarium under the number 5033. After the collection, the healthy fruits were washed with tap water and immersed in a sanitized solution of sodium dichloroisocyanurate 0.66% (content of active chlorine of 3%) for 10 minutes. Afterwards, the fruits were peeled, pulped and the pulp was subsequently dried in an oven at 40°C with an air flow of 0.5 m.s<sup>-1</sup> for 72 hours. The dried material was crushed, sieved through a 20-mesh sieve for powder

uniformity, subsequently packaged in flexible polyethylene packages and stored at room temperature.

### Oil extraction

The *Attalea phalerata* Mart. ex Spreng. oil (APMO) was obtained by Soxhlet extraction with hexane solvent PA (Vetec) at a ratio of 3 part dewatered pulp powder to 6 parts solvent 3:6 (w.v<sup>-1</sup>) under continuous extraction until sample exhaustion. The product was filtered, the solvent removed and the oil stored in low temperature (3°C) until further analysis.

### Chemicals

For the analysis of carotenoids by high-performance liquid chromatography,  $\beta$ -carotene ( $\geq 97\%$  Sigma-Aldrich),  $\alpha$ -carotene ( $\geq 98\%$  Sigma-Aldrich), ethyl acetate UV/HPLC (Analytica) and acetonitrile UV/HPLC (Merck) were used.

For the *Artemia salina* assay, artificial sea water, brine shrimp eggs Maramar<sup>®</sup>, absolute methyl alcohol (Sigma-Aldrich) and potassium dichromate (Sigma-Aldrich) was used. For the MTT assay, cells of human colon carcinoma cell lines (T84) were purchased from the Institute of Molecular Medicine, University of Texas Health Science Center (one year before the onset of the experiments (with mycoplasma tests conducted)), medium DMEM-F12 (Sigma-Aldrich), fetal bovine serum (Gibco), penicillin antibiotic 50 UI.mL<sup>-1</sup> (Gibco), streptomycin 50  $\mu$ g.mL<sup>-1</sup> (Gibco) and triton X-100 (Proquímios) were used.

For the comet assay, the following reagents were used: hydrochloric acid (CRQ), low melting point agarose (Agargen), standard agarose (Agargen), absolute ethanol (CRQ), ethidium bromide (Ludwig-Biotec), cyclophosphamide (Sigma-Aldrich) ethylenediaminetetracetic acid (Proquímios), heparin (Critália), potassium chloride (Vetec), monobasic anhydrous potassium phosphate (Scientific Exodus), pH kits (Impex), dibasic sodium phosphate (Dynamics), sodium chloride (Impex), sodium hydroxide (Vetec), saline (Arboretum), tris (Vetec) and triton X-100 (Proquímios).

For micronucleus test, hydrochloric acid (CRQ), absolute ethanol (CRQ), absolute methanol (Sigma-Aldrich), anhydrous monobasic potassium phosphate (Ex Scientific), dibasic sodium phosphate (dynamics), cyclophosphamide (Sigma-Aldrich), Giemsa (Laborclin), sodium hydroxide (Vetec), saline (Arboretum) and fetal bovine serum (Laborclin) were used. In order to prepare the oil used in the gavage administration, Tween<sup>®</sup> 80 and saline (Arboretum) were used. For the euthanasia procedure, the anaesthetic Isoflurane (Cristalia) was applied.

### Carotenoids characterization: *High performance liquid chromatography*

The sample was analyzed using an analytical high performance liquid chromatography (HPLC) (LC-6AD, Shimadzu, Kyoto, Japan) system with a binary solvent. A photodiode array detector (PAD) was monitored at  $\lambda = 200\text{--}800$  nm and column ODS HYPERSIL (C-18, 150 mm length x 4,6 mm inside diameter, particle size, 5  $\mu$ m Thermo Electron Corporation). The elution was carried out using 90% acetonitrile, 10% ethyl acetate, in 15 min 50% acetonitrile, 50% ethyl acetate, in 25 min returning to the initial condition. The flow rate and injected volume were 0.7 mL min<sup>-1</sup> and 20  $\mu$ L, respectively. All chromatographic analyses were performed at 22°C. The content estimation of the compounds in the *A. phalerata* oil was performed by external calibration employing HPLC. A linear least-square regression of the peak areas as a function of the concentrations was performed to determine the correlation coefficients. The equation parameters (slope and intercept) of the standard curve were used to obtain the concentration values for the samples.

## Artemia salina assay

The lethality of APMO was evaluated using the brine shrimp lethality test (*Artemia salina*). The procedure was performed in accordance with Martin's methodology [24]. Standard and sample solutions of the APMO (0.5–50 mg.mL<sup>-1</sup> concentration) were prepared in methanol. After the solvent evaporation, 10 newborn *Artemia salina* nauplii were placed in test tubes containing 5 mL of artificial seawater. The assays were repeated four times for each concentration. Plates were observed after 24 hours of incubation using a Research Stereomicroscope System (Olympus SZX9) and the survival rate (%) was logged.

## MTT cytotoxicity assay

MTT (3-(4,5-dimethylthiazol-2-yl)-2,5-diphenyltetrazolium bromide) assay was performed in accordance with Quassinti's methodology [25] with some modifications. The T84 cells were incubated with DMEM-F12 with 10% fetal bovine serum in 96-well plate (well volume: 0.34 mL; growth surface: 0.31 cm<sup>2</sup>, inner diameter: 6.4 mm, dimensions (mm): 128 x 85 x 22) in a humidified incubator with 5% CO<sub>2</sub> at 37°C for 72 hours until reaching 80–100% confluence. The cells were cultured in accordance with the ATCC protocol. Different concentrations of the APMO were prepared (1, 2.5, 5, 10 and 20 mg.mL<sup>-1</sup>) and incubated for 1, 24 and 48 hours. The medium was replaced by serum-free medium and 10  $\mu$ L (5 mg.mL<sup>-1</sup>) of the MTT volume was added to it. Then, plates were incubated for 1–3 hours at 37°C (until reaching purple coloration), the medium removed and replaced by the solution of isopropyl alcohol/HCl 0.04 M. The mixture was stirred vigorously in a shaker until the purple color was homogeneous. The optical density was measured by a microplate reader (SpectraMax-M2<sup>e</sup> –software SPECTRAMax M2e ROM versão 2.1) at 570 nm. Triton (1%) was used as positive control for cell viability.

## Animals and exposures

This study was carried out using 30 male and 30 female *Wistar* rats (*Rattus norvegicus*). The animals were at 8–10 weeks old, weighing between 235–243 g for females and 413–434 g for males. The animals obtained from the State University of Maringá were housed in polypropylene rodent cages under controlled temperature (23°C), humidity (40–60%) and 12h light/dark cycle with *ad libitum* access to water and standard commercial feed.

The rats were divided into six experimental groups of ten animals each (five males and five females). The APMO was diluted in saline + Tween 80<sup>®</sup> and administered by gavage, in doses of 125, 250, 500 or 1000 mg.kg<sup>-1</sup> body weight, daily for 28 consecutive days. The doses were chosen based on our subchronic toxicity studies in rats, and following the dose limit recommended by the OECD [26] for subacute treatments in toxicology assays. The negative control group received saline + Tween 80<sup>®</sup>. The positive control group received an intraperitoneal injection of cyclophosphamide of 20 mg.kg<sup>-1</sup> body weight. The animals were observed daily during the whole experiment. Signs related to animal health and welfare were evaluated according to the Hippocratic screening, assessment of body weight, feed and water intake. If any animal presented any signs that would compromise its welfare, it would be euthanized in order to prevent suffering.

This study was carried out in strict accordance with the recommendations in the Guide for the Care and Use of Laboratory Animals of the National Institutes of Health. All experiments were approved by the Ethics Committee on Animal Research of the Federal University of Grande Dourados, under the permit number 21/2015. The animals used in this study were euthanized with inhalational anesthetic (isoflurane) in gas chamber followed by exsanguination.

## Comet assay

The comet assay (Single Cell Gel Electrophoresis—SCGE) was performed according to the protocol described by the OECD [18] with some modifications. Blood samples from all animals were obtained by caudal puncture with a needle soaked in Heparin and 40  $\mu$ L of the blood was transferred to a micro-tube containing 120  $\mu$ L of low melting point agarose (1.5%) at 37°C. The mixture was homogenized and transferred into pre-coated slides with 5% standard agarose. Two slides were prepared per animal. The slides were covered with coverslips and maintained in the dark at 3°C for 20 minutes.

After the waiting time, the coverslips were removed and the slides were immersed in lysis solution [89 mL stock lysis solution (2.5 M NaCl, 100 mM EDTA, 10 mM Tris, pH 10.0), and 89 mL distilled water], 1 mL Triton X-100, and 10 mL dimethyl sulfoxide for 1 hour at 3°C in the dark. After 1 hour, the slides were placed into the electrophoresis unit (Loccus) containing buffer solution at pH > 13 (300 Mm NaOH and 1 mM EDTA, prepared from a stock solution of 10 N NaOH and 200 mM EDTA, pH 10.0) at 4°C for 20 min in the dark, in order to allow the denaturation of the DNA.

The electrophoresis step was performed at 4°C for 20 min at 300 mA and 25 V, protected from light. After the run, the slides were submerged in neutralization buffer using 0.4 M Tris-HCl at pH 7.5 for three cycles of 5 min each, dried, fixed with 100% ethanol for 10 min, and stored for later analysis. Finally, the slides were stained with ethidium bromide (20 mg.mL<sup>-1</sup>) and covered with a coverslip. All material was analyzed by fluorescence microscopy (Nikon—H550S—40X magnification), equipped with an excitation filter (420–490 nm) and a barrier filter (520 nm).

Only individual nuclei were analyzed and the extent of damage in DNA was assessed by examining 100 cells per animal. The extent of DNA which migrated during electrophoresis and the migration distance reflects the amount and size of the DNA fragments. The comet findings were classified as follows: class 0—no damage; class 1—comet tail shorter than the diameter of the nucleoid; class 2—comet tail once or twice the diameter of the nucleoid and class 3—comet tail greater than twice the size of the nucleoid. Comets with a turbid aspect or a head that was too small were excluded from the analyses, as they could represent dead cells [27].

The damage index (DI) and damage frequency (DF) were calculated based on the readings. The DI was calculated by multiplying the number of cells damaged by the value assigned to this damage. Therefore, this value ranges from 0 (no damage: 0 x 100 cells) to 300 (maximum damage: 3 x 100 cells). DF was calculated by summing the number of damaged cells (class 1, 2 or 3) and ranged from 0 (no damage) to 100 (maximum damage).

## Micronucleus assay

The assay was performed following the protocol recommended by the OECD [19] with some modifications. The same animals used in the comet assay were also used in this test. The femoral bone marrow was removed, washed using 1 mL of bovine fetal serum and centrifuged (Spinlab—SL-5AM) for 5 minutes at 1000 rpm. The supernate was discarded and the pellets were used to make smears on slides. The slides were coded for blind analysis, fixed with methanol for 10 minutes and stained with Giemsa for 15 minutes. For the analysis of cells, 2000 polychromatic erythrocytes (PCE) per animal were evaluated for the presence of micronuclei in order to assess the clastogenic capacity of the APMO. The average number of micronucleated polychromatic erythrocytes (MNPCEs) per individual was used as the experimental unit and the standard deviation was based on the differences among animals of the same group.

To detect any cytotoxic effects, the relationship between PCE/NCE (polychromatic erythrocytes/normochromatic erythrocytes) was determined by analyzing 200 random erythrocytes

per animal. The cells were analyzed by light microscope (Olympus—CX41) under magnification of 1000x.

### Statistical Analysis

The results were expressed as mean ± SEM. The differences between groups were determined by analysis of variance (one-way ANOVA) followed by Tukey’s test. P-values less than 0.05 were considered significant.

## Results and Discussion

### Chemical composition

The characterization of carotenoid by HPLC of APMO showed two major compounds (Table 1). The main compounds found in the oil are β-carotene and α-carotene, in which β-carotene is the major one. Due to the high concentration of the carotenoids, the results indicate that the oil will exhibit activities and act as a potential preventer of chronic diseases [1, 22]. Previous pharmacological studies performed with fruit pulp oils from the Cerrado with high levels of carotenoids, have shown great anti-edematogenic potential in rats [7, 13] Quantitative values for β-carotene were evaluated in other fruits from the Cerrado, such as the *Caryocar brasiliense* Camb. (42.4 µg/g), *Annona crassiflora* Mart. (19.7 µg/g), *Eugenia dysenterica* DC. (3.96 µg/g), *Hymenaea stigonocarpa* Mart. (3.96 µg/g) e *Hancornia speciosa* Gomes (0.6 µg/g) [28].

### Artemia salina assay

The results of the brine shrimp nauplii survival rates were not statistically different (p <0.05) in all doses of the APMO when compared to the negative control group. As expected, the experimental groups (10, 50, 100, 250, and 500 µg.mL<sup>-1</sup> of oil) and the negative control group presented statistical differences when compared to the positive control group (K<sub>2</sub>Cr<sub>2</sub>O<sub>7</sub> 0.7%). These results demonstrate the low cytotoxicity of the APMO in microcrustaceans (Fig 1).

### MTT assay

The MTT results (Fig 2) showed the absence of cytotoxicity of the APMO at doses of 1, 2.5, 5, 10 and 20 mg/mL<sup>-1</sup> (dose and time dependent manner) where the experimental doses did not differ statistically (p <0.05) when compared to the negative control group (medium). However, the experimental groups and the negative control group showed statistical differences when compared to the positive control group (Triton 1%).

**Table 1. Characterization of the α-carotene and β-carotene values by chromatographic analysis in *Attalea phalerata* Mart. ex Spreng. oil (APMO).**

|                                             | Standards  |            |
|---------------------------------------------|------------|------------|
|                                             | α carotene | β carotene |
| Retention time (min)                        | 17.35      | 18.51      |
| Linear Range (µg)                           | 3–12       | 0.30–2     |
| Intercept(a)                                | 3995.30    | 4314.30    |
| Slope (b)                                   | 4009.30    | 16411.00   |
| Determination coefficient (R <sup>2</sup> ) | 0.993      | 0.991      |
| Carotenoids concentration (µg/g)            | 10.93      | 61.72      |

Linear regression, formula:  $y = a + bx$ , where  $y$  = ratio of peak areas;  $x$  = concentration (µg);  $a$  = intercept and  $b$  = slope.

doi:10.1371/journal.pone.0165258.t001



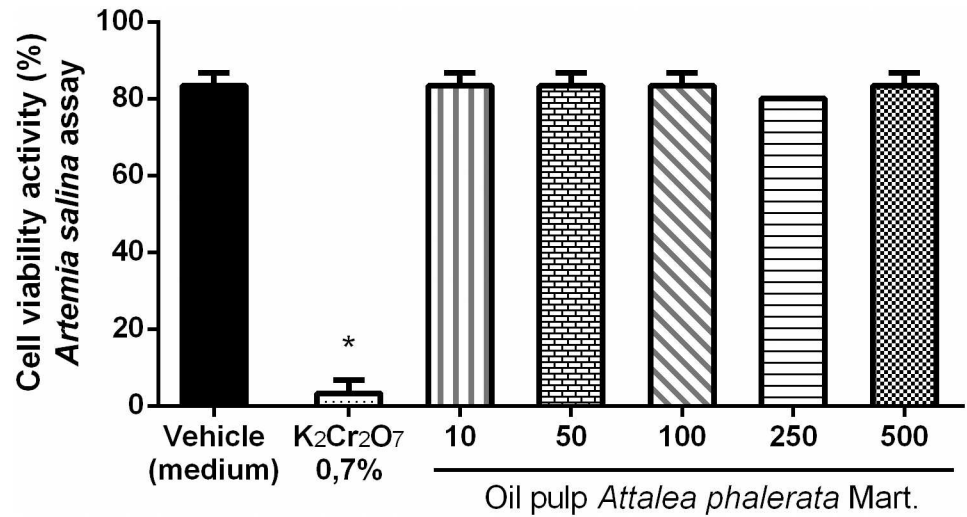

**Fig 1. Effects of the APMO on *Artemia salina* assay.** *Artemia salina* nauplii were treated with 10, 50, 100, 250 and 500  $\mu\text{g.mL}^{-1}$  of oil or vehicle (medium) for 24 h. Results are presented as mean + SEM. n = 4; One-way ANOVA followed by Tukey's test; \*p<0.05 compared to vehicle (medium) and experimental group (10, 50, 100, 250 and 500  $\mu\text{g.mL}^{-1}$  of oil).

doi:10.1371/journal.pone.0165258.g001

### Comet and Micronuclei assays

Comet and micronuclei assays are effective tests to determine the cytotoxicity, genotoxicity and clastogenicity. The *in vivo* release from mammalian cells under alkaline conditions in the comet assay was used in our study, according to the OECD [19]. This test provides a broad-spectrum detection of the levels of DNA damage, such as DNA denaturation and detection of

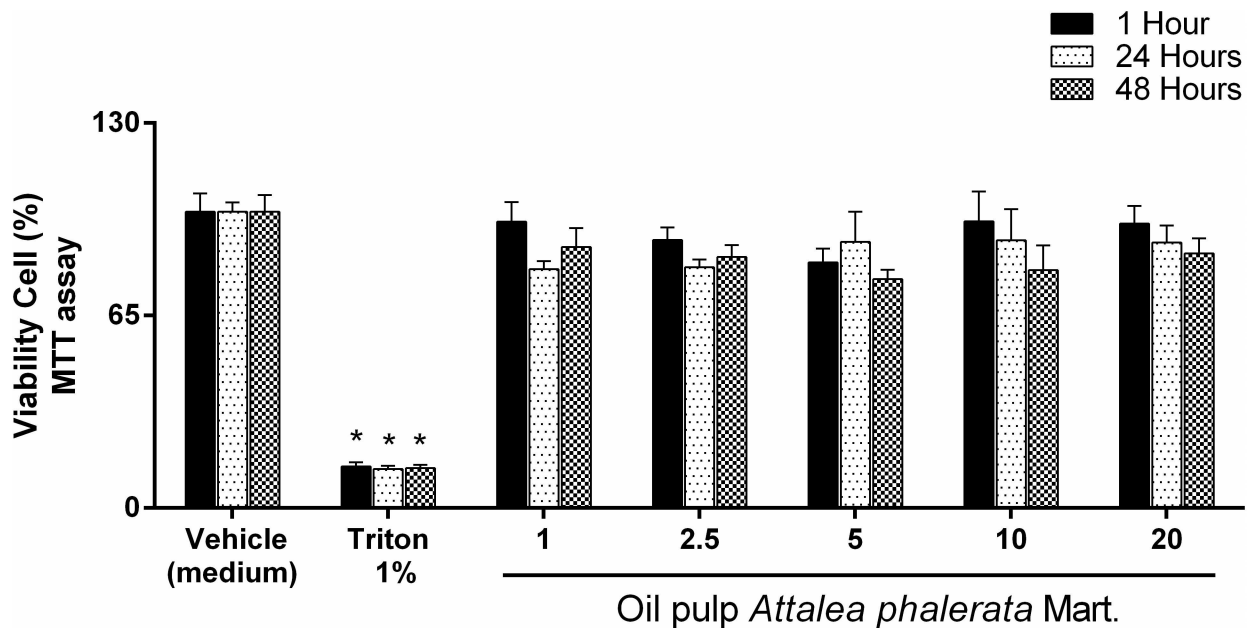

**Fig 2. Effects of the APMO on cell metabolic activity by MTT assay.** T84 cells were treated with 1, 2.5, 5, 10 and 1  $\text{mg.mL}^{-1}$  of oil or vehicle (medium) for 1h, 24h and 48h. Results are presented as mean + SEM. n = 8; One-way ANOVA followed by Tukey's test; \*p<0.05 compared to vehicle (medium) and experimental group (1, 2.5, 5, 10 and 1  $\text{mg.mL}^{-1}$  of oil).

doi:10.1371/journal.pone.0165258.g002

**Table 2. Effect of the APMO in exposed rats as measured by the comet assay.** The groups were treated with 125, 250, 500 and 1000 mg.kg<sup>-1</sup> of the *Attalea phalerata* Mart. ex Spreng. oil (APMO) daily for 28 consecutive days (four weeks) and the negative control group received the vehicle (saline + Tween 80<sup>®</sup>). The positive control group received intraperitoneal injection of cyclophosphamide at 20 mg.kg<sup>-1</sup>.

| Groups                           | Damage frequency          | Classes of damage |              |              |             | Damage index               |
|----------------------------------|---------------------------|-------------------|--------------|--------------|-------------|----------------------------|
|                                  |                           | 0                 | 1            | 2            | 3           |                            |
| Female                           |                           |                   |              |              |             |                            |
| Negative Control                 | 6.20 ± 0.73 <sup>a</sup>  | 93.80 ± 0.73      | 6.20 ± 0.73  | 0.00 ± 0.00  | 0.00 ± 0.00 | 6.20 ± 0.73 <sup>a</sup>   |
| Cyclophosphamide                 | 85.40 ± 1.75 <sup>b</sup> | 14.60 ± 1.75      | 41.20 ± 1.07 | 38.80 ± 1.68 | 5.40 ± 1.83 | 135.00 ± 5.07 <sup>b</sup> |
| 125 mg.kg <sup>-1</sup> of APMO  | 8.40 ± 2.01 <sup>a</sup>  | 91.60 ± 2.01      | 8.00 ± 2.07  | 0.40 ± 0.24  | 0.00 ± 0.00 | 8.80 ± 1.98 <sup>a</sup>   |
| 250 mg.kg <sup>-1</sup> of APMO  | 8.60 ± 2.80 <sup>a</sup>  | 89.25 ± 2.32      | 10.75 ± 2.32 | 0.00 ± 0.00  | 0.00 ± 0.00 | 8.60 ± 2.80 <sup>a</sup>   |
| 500 mg.kg <sup>-1</sup> of APMO  | 6.20 ± 0.58 <sup>a</sup>  | 93.80 ± 0.58      | 5.80 ± 0.66  | 0.40 ± 0.24  | 0.00 ± 0.00 | 6.60 ± 0.60 <sup>a</sup>   |
| 1000 mg.kg <sup>-1</sup> of APMO | 7.80 ± 2.18 <sup>a</sup>  | 90.25 ± 1.25      | 8.75 ± 1.11  | 0.75 ± 0.48  | 0.25 ± 0.25 | 8.80 ± 2.56 <sup>a</sup>   |
| Male                             |                           |                   |              |              |             |                            |
| Negative Control                 | 6.60 ± 1.21 <sup>a</sup>  | 93.40 ± 1.21      | 6.00 ± 1.38  | 0.60 ± 0.40  | 0.00 ± 0.00 | 7.20 ± 1.16 <sup>a</sup>   |
| Cyclophosphamide                 | 89.60 ± 1.50 <sup>b</sup> | 10.40 ± 1.50      | 41.80 ± 1.69 | 40.60 ± 1.50 | 7.20 ± 1.98 | 144.60 ± 2.87 <sup>b</sup> |
| 125 mg.kg <sup>-1</sup> of APMO  | 11.80 ± 0.97 <sup>a</sup> | 88.20 ± 0.97      | 9.80 ± 1.16  | 2.00 ± 0.71  | 0.00 ± 0.00 | 13.80 ± 1.24 <sup>a</sup>  |
| 250 mg.kg <sup>-1</sup> of APMO  | 13.20 ± 3.73 <sup>a</sup> | 87.00 ± 3.79      | 12.80 ± 3.83 | 0.40 ± 0.40  | 0.00 ± 0.00 | 13.60 ± 3.67 <sup>a</sup>  |
| 500 mg.kg <sup>-1</sup> of APMO  | 9.00 ± 1.52 <sup>a</sup>  | 91.00 ± 1.52      | 8.80 ± 1.50  | 0.20 ± 0.20  | 0.00 ± 0.00 | 9.20 ± 1.56 <sup>a</sup>   |
| 1000 mg.kg <sup>-1</sup> of APMO | 12.60 ± 2.52 <sup>a</sup> | 87.40 ± 2.52      | 11.40 ± 2.54 | 1.00 ± 0.45  | 0.20 ± 0.20 | 14.00 ± 2.70 <sup>a</sup>  |

Negative control—saline solution + Tween 80<sup>®</sup>; Cyclophosphamide—20 mg.kg<sup>-1</sup> ip.; *Attalea phalerata* Mart. oil at doses of 125, 250, 500 e 1000 mg.kg<sup>-1</sup> by gavage. Different letters (a and b) indicate statistically significant differences (p < 0.05) of positive group (cyclophosphamide) between negative control and experimental group (doses 125, 250, 500 e 1000 mg.kg<sup>-1</sup>); ANOVA/Tukey

doi:10.1371/journal.pone.0165258.t002

alkali-labile sites [3–5]. Cells obtained by caudal puncture from rats were analyzed. The results obtained with the comet assay (Table 2) show DNA damage (according to the size of the tail) in peripheral blood leukocytes (harvested after daily treatment for four weeks). Cell viability for the negative control group (saline + Tween 80) was higher compared to the positive control group (cyclophosphamide 20 mg.kg<sup>-1</sup>), confirming the low genotoxicity rate in healthy rats. As expected, cyclophosphamide significantly increased the DNA leukocyte migration (p < 0.05) when compared to the negative control group. At doses of 125, 250, 500 and 1000 mg.kg<sup>-1</sup> of the APMO, there was no significant increase in DNA breaks (p < 0.05) when compared to the negative control group. Most cells exposed to four concentrations of test compound were examined in slides and showed no DNA damage (Class 0) followed by a few class 1 DNA damage events.

The *in vivo* version of the micronucleus test in mammalian cells was performed in our study [19] and enabled evaluation of the presence or absence of damage caused by the chemical compounds of the APMO on chromosomes and/or mitotic apparatus of erythroblasts [6, 19, 29]. This *in vivo* test is the main test which assess the genetic toxicology to provide cytotoxic and mutagenic results and is highly recommended by global regulators. In this study, cells obtained from the marrow bone of the animals were analyzed after daily treatment with the APMO, for four weeks, at four different doses, as showed in Fig 3.

There was no statistical difference (p < 0.05) in the frequency of micronuclei in polychromatic erythrocytes (MNPCEs) among the negative control group (saline + Tween 80) and the groups treated with four doses of the APMO, indicating no clastogenic effects of this oil. As expected, the treated animals in the positive control group (cyclophosphamide 20 mg.kg<sup>-1</sup>) showed large numbers of micronucleated polychromatic erythrocytes in bone marrow cells when compared to the negative control and to the experimental groups (p < 0.05). The estimated ratio of PCE/NCE in bone marrow preparations showed no statistical significant



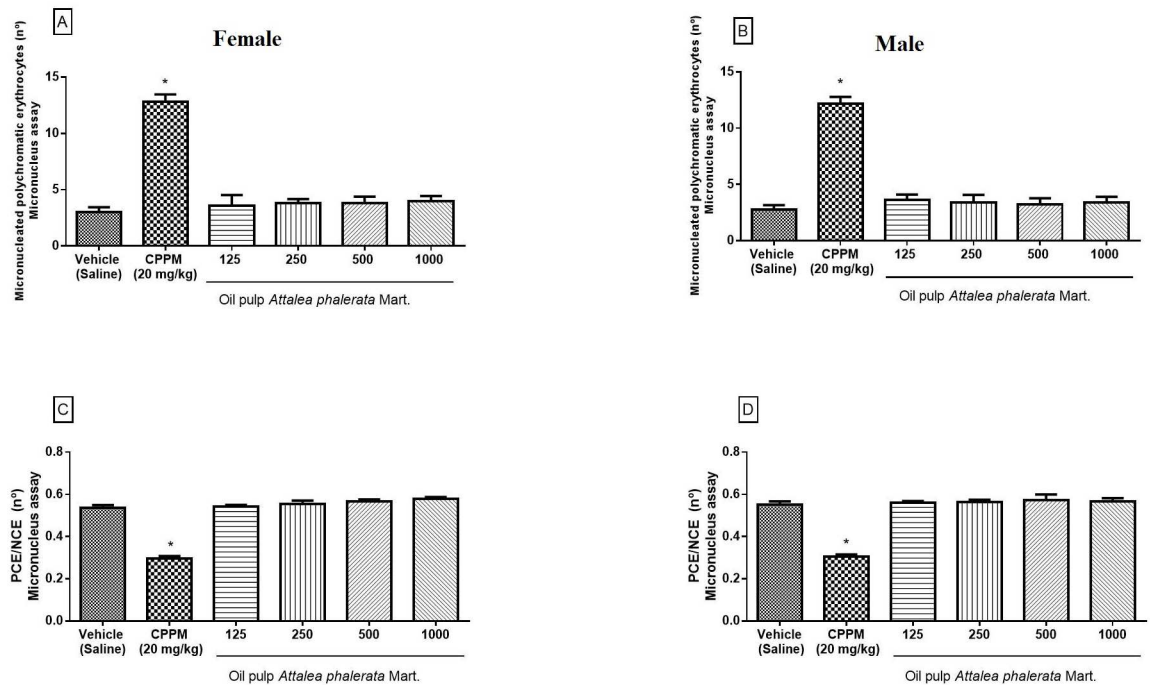

**Fig 3. Effect of the APMO on Micronucleated Polychromatic Erythrocytes (Fig 3A and 3B) and the ratio between Polychromatic Erythrocytes/Normochromatic Erythrocytes—PCE/NCE (Fig 3C and 3D) micronucleus assay.** Groups of female (Fig 3A and 3C) and male (Fig 3B and 3D) rats were treated with 125, 250, 500 and 1000 mg.kg<sup>-1</sup> of the APMO daily for 28 consecutive days (four weeks) and the negative control group received the vehicle (saline + Tween 80®). The positive control group received intraperitoneal injection of cyclophosphamide (CPPM) 20mg.kg<sup>-1</sup>. Results are presented as mean + SEM; One-way ANOVA followed by Tukey's test; \*p<0.05 compared to vehicle (saline) and experimental group (treated with 125, 250, 500 and 1000 mg.kg<sup>-1</sup> of the oil).

doi:10.1371/journal.pone.0165258.g003

changes in hematopoiesis after the administration of the APMO, indicating no cytotoxic effects from the use of *A. phalerata* oil.

No published studies involving the evaluation of cytotoxic, genotoxic and clastogenic potential of *A. phalerata* oil were found. Thus, the results corroborate with studies conducted with Cerrado fruits, in which the antigenotoxic/genotoxic and antimutagenic/mutagenic activities were evaluated [30, 31], with satisfactory results for both parameters and driving interest in evaluating the possible antigenotoxic and antimutagenic activities of the APMO in future studies.

## Conclusions

The results obtained in the micronucleus test are consistent with those observed by the comet assay, as well as *Artemia salina* and MTT assays. In conclusion, the results of this study demonstrate that the *A. phalerata* pulp oil has no cytotoxicity, genotoxicity and clastogenicity at doses tested in the experimental models used. The results demonstrated the safe use of the fruit pulp oil in folk medicine. In an ethnopharmacological context, the trials are considered important prerequisites for the identification of genetic diseases. Although the genotoxicity is not a direct measure of carcinogenicity, it is often used as an indicator for cancer, since the tests measure an initial or intermediate event in tumorigenesis.

## Acknowledgments

The authors would like to thank Dr. Gilberto De Nucci for providing scientific advice and Dr. Ghazal Nabi Edavile for providing language help.

## Author Contributions

**Conceptualization:** FFL SELTM GKT MCV SAO.

**Data curation:** FFL SELTM GKT FHSA CHL MCV SAO.

**Formal analysis:** FFL SELTM GKT SAO.

**Funding acquisition:** MCV.

**Investigation:** FFL SELTM GKT FHSA CHL SMP FAMS SCHV MCV SAO.

**Methodology:** FFL SELTM GKT FHSA CHL MCV SAO.

**Project administration:** SAO.

**Resources:** CHL MCV SAO.

**Software:** FFL SELTM GKT FHSA CHL MCV SAO.

**Supervision:** MCV SAO.

**Validation:** FFL SELTM GKT FHSA CHL SMP FAMS SCHV.

**Visualization:** FFL SELTM GKT MCV SAO.

**Writing – original draft:** FFL SELTM GKT MCV SAO.

**Writing – review & editing:** FFL SELTM GKT MCV SAO.

## References

1. Al-Okbi SY. Nutraceuticals of anti-inflammatory activity as complementary therapy for rheumatoid arthritis. *Toxicology and industrial health*. 2014; 30(8):738–49. Epub 2012/10/30. doi: [10.1177/0748233712462468](https://doi.org/10.1177/0748233712462468) PMID: [23104728](https://pubmed.ncbi.nlm.nih.gov/23104728/).
2. Kaulmann A, Bohn T. Carotenoids, inflammation, and oxidative stress—implications of cellular signaling pathways and relation to chronic disease prevention. *Nutrition research (New York, NY)*. 2014; 34(11):907–29. Epub 2014/08/20. doi: [10.1016/j.nutres.2014.07.010](https://doi.org/10.1016/j.nutres.2014.07.010) PMID: [25134454](https://pubmed.ncbi.nlm.nih.gov/25134454/).
3. Singh NP, McCoy MT, Tice RR, Schneider EL. A simple technique for quantitation of low levels of DNA damage in individual cells. *Experimental cell research*. 1988; 175(1):184–91. Epub 1988/03/01. PMID: [3345800](https://pubmed.ncbi.nlm.nih.gov/3345800/).
4. Hartmann A, Agurell E, Beevers C, Brendler-Schwaab S, Burlinson B, Clay P, et al. Recommendations for conducting the in vivo alkaline Comet assay. 4th International Comet Assay Workshop. *Mutagenesis*. 2003; 18(1):45–51. Epub 2002/12/11. PMID: [12473734](https://pubmed.ncbi.nlm.nih.gov/12473734/).
5. Collins AR, Oscoz AA, Brunborg G, Gaivao I, Giovannelli L, Kruszewski M, et al. The comet assay: topical issues. *Mutagenesis*. 2008; 23(3):143–51. Epub 2008/02/20. doi: [10.1093/mutage/gem051](https://doi.org/10.1093/mutage/gem051) PMID: [18283046](https://pubmed.ncbi.nlm.nih.gov/18283046/).
6. Vinod V, Tiwari PK, Meshram GP. Evaluation of mutagenic and antimutagenic activities of neem (*Azadirachta indica*) seed oil in the in vitro Ames Salmonella/microsome assay and in vivo mouse bone marrow micronucleus test. *Journal of ethnopharmacology*. 2011; 134(3):931–7. <http://dx.doi.org/10.1016/j.jep.2011.02.003> doi: [10.1016/j.jep.2011.02.003](https://doi.org/10.1016/j.jep.2011.02.003) PMID: [21315815](https://pubmed.ncbi.nlm.nih.gov/21315815/)
7. DE LIMA FF. MICROENCAPSULAÇÃO DO ÓLEO DE BACURI POR COACERVAÇÃO COMPLEXA: OBTENÇÃO, CARACTERIZAÇÃO E AVALIAÇÃO BIOLÓGICA. 2014.
8. Balslev H, Moraes M. Sinopsis de lãs palmeras de Bolivia. AAU Reports, Whasington. 1989; 20:1–107.
9. Negrelle R R B. *Attalea phalerata* Mart. ex Spreng.: Aspectos botânicos, ecológicos, etnobotânicos e agrônômicos. *Ciência Florestal*. 2015; 25(4):1061–1066.
10. Gomes FdS. Carotenóides: uma possível proteção contra o desenvolvimento de câncer. *Revista de Nutrição*. 2007; 20:537–48.
11. Rodriguez-Amaya DB. Quantitative analysis, in vitro assessment of bioavailability and antioxidant activity of food carotenoids—A review. *Journal of Food Composition and Analysis*. 2010; 23(7):726–40. <http://dx.doi.org/10.1016/j.jfca.2010.03.008>.

12. Lee TC, Ivester P, Hester AG, Sergeant S, Case LD, Morgan T, et al. The impact of polyunsaturated fatty acid-based dietary supplements on disease biomarkers in a metabolic syndrome/diabetes population. *Lipids in health and disease*. 2014; 13:196. Epub 2014/12/18. doi: [10.1186/1476-511x-13-196](https://doi.org/10.1186/1476-511x-13-196) PMID: [25515553](https://pubmed.ncbi.nlm.nih.gov/25515553/); PubMed Central PMCID: [PMC4290816](https://pubmed.ncbi.nlm.nih.gov/PMC4290816/).
13. Lescano CH, Iwamoto RD, Sanjinez-Argandona EJ, Kassuya CA. Diuretic and Anti-Inflammatory Activities of the Microencapsulated *Acrocomia aculeata* (Arecaceae) Oil on Wistar Rats. *Journal of medicinal food*. 2015; 18(6):656–62. Epub 2014/11/05. doi: [10.1089/jmf.2014.0077](https://doi.org/10.1089/jmf.2014.0077) PMID: [25369069](https://pubmed.ncbi.nlm.nih.gov/25369069/); PubMed Central PMCID: [PMC4458740](https://pubmed.ncbi.nlm.nih.gov/PMC4458740/).
14. de Oliveira FF, de Araujo JC, Pereira AF, Brito GA, Gondim DV, Ribeiro Rde A, et al. Antinociceptive and anti-inflammatory effects of Caryocar coriaceum Wittm fruit pulp fixed ethyl acetate extract on zymosan-induced arthritis in rats. *Journal of ethnopharmacology*. 2015; 174:452–63. Epub 2015/09/06. doi: [10.1016/j.jep.2015.08.017](https://doi.org/10.1016/j.jep.2015.08.017) PMID: [26341615](https://pubmed.ncbi.nlm.nih.gov/26341615/).
15. Hall AH. Computer modeling and computational toxicology in new chemical and pharmaceutical product development. *Toxicology letters*. 1998; 102–103:623–6. Epub 1999/02/18. PMID: [10022324](https://pubmed.ncbi.nlm.nih.gov/10022324/).
16. Ribnicky DM, Poulev A, Schmidt B, Cefalu WT, Raskin I. Evaluation of botanicals for improving human health. *The American journal of clinical nutrition*. 2008; 87(2):472S–5S. Epub 2008/02/09. PMID: [18258641](https://pubmed.ncbi.nlm.nih.gov/18258641/).
17. Li S, Zhang B, Zhang N. Network target for screening synergistic drug combinations with application to traditional Chinese medicine. *BMC systems biology*. 2011; 5 Suppl 1:S10. Epub 2011/06/28. doi: [10.1186/1752-0509-5-s1-s10](https://doi.org/10.1186/1752-0509-5-s1-s10) PMID: [21689469](https://pubmed.ncbi.nlm.nih.gov/21689469/); PubMed Central PMCID: [PMC3121110](https://pubmed.ncbi.nlm.nih.gov/PMC3121110/).
18. Meyer BN, Ferrigni NR, Putnam JE, Jacobsen LB, Nichols DE, McLaughlin JL. Brine shrimp: a convenient general bioassay for active plant constituents. *Planta medica*. 1982; 45(5):31–4. Epub 1982/05/01. doi: [10.1055/s-2007-971236](https://doi.org/10.1055/s-2007-971236) PMID: [17396775](https://pubmed.ncbi.nlm.nih.gov/17396775/).
19. Shariffar F, Moshafi MH, Dehghan-Nudehe G, Ameri A, Alishahi F, Pourhemati A. Bioassay screening of the essential oil and various extracts from 4 spices medicinal plants. *Pakistan journal of pharmaceutical sciences*. 2009; 22(3):317–22. Epub 2009/06/26. PMID: [19553182](https://pubmed.ncbi.nlm.nih.gov/19553182/).
20. Sadeghi I, Yousefzadi M, Behmanesh M, Sharifi M, Moradi A. In vitro Cytotoxic and Antimicrobial Activity of Essential Oil From *Satureja Intermedia*. *Iran Red Crescent Med J*. 2013; 15(1):70–4. Epub 2013-01-05. doi: [10.5812/ircmj.4989](https://doi.org/10.5812/ircmj.4989) PMID: [23487431](https://pubmed.ncbi.nlm.nih.gov/23487431/)
21. OECD. Test No. 489: In Vivo Mammalian Alkaline Comet Assay: OECD Publishing.
22. OECD. Test No. 474: Mammalian Erythrocyte Micronucleus Test: OECD Publishing.
23. Araldi RP, de Melo TC, Mendes TB, de Sa Junior PL, Nozima BH, Ito ET, et al. Using the comet and micronucleus assays for genotoxicity studies: A review. *Biomedicine & pharmacotherapy = Biomedicine & pharmacotherapie*. 2015; 72:74–82. Epub 2015/06/10. doi: [10.1016/j.biopha.2015.04.004](https://doi.org/10.1016/j.biopha.2015.04.004) PMID: [26054678](https://pubmed.ncbi.nlm.nih.gov/26054678/).
24. Martins Mdo R, Arantes S, Candeias F, Tinoco MT, Cruz-Morais J. Antioxidant, antimicrobial and toxicological properties of *Schinus molle* L. essential oils. *Journal of ethnopharmacology*. 2014; 151(1):485–92. Epub 2013/11/16. doi: [10.1016/j.jep.2013.10.063](https://doi.org/10.1016/j.jep.2013.10.063) PMID: [24231069](https://pubmed.ncbi.nlm.nih.gov/24231069/).
25. Quassinti L, Lupidi G, Maggi F, Sagratini G, Papa F, Vittori S, et al. Antioxidant and antiproliferative activity of *Hypericum hircinum* L. subsp. *majus* (Aiton) N. Robson essential oil. *Natural product research*. 2013; 27(10):862–8. Epub 2012/04/07. doi: [10.1080/14786419.2012.677044](https://doi.org/10.1080/14786419.2012.677044) PMID: [22480321](https://pubmed.ncbi.nlm.nih.gov/22480321/).
26. OECD. Test No. 407: Repeated Dose 28-day Oral Toxicity Study in Rodents: OECD Publishing.
27. CARDOSO LM. ARATICUM, CAGAITA, JATOBÁ, MANGABA E PEQUI DO CERRADO DE MINAS GERAIS: OCORRÊNCIA E CONTEÚDO DE CAROTENÓIDES E VITAMINAS. 2011.
28. da Silva CJ, dos Santos JE, Satie Takahashi C. An evaluation of the genotoxic and cytotoxic effects of the anti-obesity drugs sibutramine and fenproporex. *Human & experimental toxicology*. 2010; 29(3):187–97. Epub 2010/01/07. doi: [10.1177/0960327109358732](https://doi.org/10.1177/0960327109358732) PMID: [20051455](https://pubmed.ncbi.nlm.nih.gov/20051455/).
29. Samanta S, Dey P. Micronucleus and its applications. *Diagnostic cytopathology*. 2012; 40(1):84–90. doi: [10.1002/dc.21592](https://doi.org/10.1002/dc.21592) PMID: [22180242](https://pubmed.ncbi.nlm.nih.gov/22180242/)
30. Malta LG, Ghiraldini FG, Reis R, Oliveira MdV, Silva LB, Pastore GM. In vivo analysis of antigenotoxic and antimutagenic properties of two Brazilian Cerrado fruits and the identification of phenolic phytochemicals. *Food Research International*. 2012; 49(1):604–11. <http://dx.doi.org/10.1016/j.foodres.2012.07.055>.
31. Munari CC, de Oliveira PF, de Souza Lima IM, de Paula Lima Martins S, de Carvalho da Costa J, Bastos JK, et al. Evaluation of cytotoxic, genotoxic and antigenotoxic potential of *Solanum lycocarpum* fruits glicoalkaloid extract in V79 cells. *Food and Chemical Toxicology*. 2012; 50(10):3696–701. <http://dx.doi.org/10.1016/j.fct.2012.07.028>. doi: [10.1016/j.fct.2012.07.028](https://doi.org/10.1016/j.fct.2012.07.028) PMID: [22842122](https://pubmed.ncbi.nlm.nih.gov/22842122/)
